# Supplementary material for: RAG suppresses group 2 innate lymphoid cells
Source: eLife journal article supplement (doi:10.7554/elife.98287), 2024-08-19
Supplement: supp1 [file Table S05 - ILC2 DEGs by RAG1 fate map status.xlsx]

## Sheet: markers_pos_01_supp_tab
gene	avg_log2FC	p_val
D5Ertd579e	1.8859	1.42043e-07
Pla2g4f	1.67024	3.22932e-07
Arhgef12	1.65444	0.000115263
Hdgfl3	1.63578	0.0441788
Cdh10	1.59013	0.457538
Opa1	1.53431	0.00016639
Apex2	1.47891	0.0289278
Gnb1l	1.45632	8.65783e-07
Klhl24	1.4457	0.054191
Ppm1l	1.42023	0.0623628
Ankrd6	1.41746	0.00297975
Vgll4	1.3846	0.000351106
Ypel5	1.37901	0.00035775
Dusp10	1.37384	0.445216
Sgpl1	1.37338	0.310717
1810030O07Rik	1.3702	0.036242
Galnt10	1.36863	0.000330408
Mef2d	1.36766	0.248443
Atp8b4	1.35659	0.0935243
Brd7	1.35552	8.53721e-07
Gm8369	1.34684	0.0481181
Dnajc1	1.3274	0.00262313
Ola1	1.32094	0.0221335
Sidt1	1.31691	0.111057
Uri1	1.31446	0.00192381
Slc35a3	1.30769	0.000312228
1500004A13Rik	1.29512	0.00559366
Ppp1r13b	1.28914	0.000627369
Mlf1	1.2836	1.07233e-05
Prorp	1.27762	6.47278e-05
Bicdl1	1.25983	0.00116181
Atxn1l	1.2541	0.00129213
Eif2s2	1.25309	0.00259204
Tmem127	1.24995	4.84248e-06
Cdc5l	1.2472	0.14057
Kctd12	1.247	0.126597
Cars2	1.24329	1.50854e-05
Togaram1	1.2423	0.00932354
Tacc2	1.22704	6.71197e-06
Dip2c	1.22629	0.833137
Cib1	1.22589	0.00529165
Zfp53	1.22507	0.060866
Virma	1.2206	0.0818074
Dnajc8	1.22045	0.000899564
Morrbid	1.20121	0.000450996
Usp32	1.19887	0.0181997
Arhgap35	1.19672	0.000936691
Prkag2	1.19547	0.0221335
Cdkl5	1.18002	3.22932e-07
Smim7	1.17231	7.69227e-06
Stx18	1.1697	0.0072154
Pam	1.16647	0.0387181
Tnfrsf8	1.1658	9.45606e-05
Usp48	1.1573	0.000295742
Msra	1.15388	0.119613
Rpgr	1.15163	0.00102928
Tcf7	1.15134	0.0419896
Thumpd3	1.1491	0.000954598
Clasp1	1.14397	0.0459267
Ube2o	1.14259	0.000842421
Trim23	1.14054	0.00254417
Ndufaf4	1.14032	8.82232e-10
Dnajc7	1.13608	0.000876867
Erlec1	1.13293	0.00129213
Man2b1	1.1321	0.00109875
Rbm12b2	1.12862	6.71197e-06
Dbt	1.11956	0.00036254
BC065397	1.11579	0.26965
A230072E10Rik	1.11558	0.174389
Stambpl1	1.11482	0.00571788
Zfp182	1.11244	0.0842906
Zc3h6	1.11216	0.00236525
Myo1d	1.1106	0.00578593
Poc5	1.10841	2.28859e-07
Itch	1.10543	0.00676378
Mgst2	1.10438	0.0233752
Tmx3	1.10102	0.00222042
Cebpd	1.10063	0.000564389
Skap2	1.09825	0.00103692
Cpm	1.09577	0.334763
Hdlbp	1.09007	0.228471
Cnot2	1.08773	0.0106135
Lrrc1	1.08179	0.00109762
Crim1	1.07848	0.0546354
Fubp1	1.07422	0.00351304
Bcap29	1.07395	0.0148709
Rasgef1b	1.06651	0.369645
Ly75	1.06604	0.0579512
Usp16	1.06433	0.13639
Chtop	1.06156	0.000841284
Abi1	1.06103	0.0549805
Actr1a	1.05781	7.60119e-05
Zgrf1	1.05721	0.00273539
Hint1	1.05693	0.0462219
Cdc37l1	1.05622	0.0507473
Serpinc1	1.05086	0.0466874
Llph	1.04858	0.00491311
Gm20275	1.0466	0.806227
Ptges3	1.04645	0.0234659
Gkap1	1.04572	0.0871946
Il1rap	1.04211	0.0285438
Arhgap39	1.04154	0.00151932
Ttc19	1.03764	0.00122819
Dcaf13	1.03742	0.00845833
Arhgap21	1.03341	0.0729699
Pcnx3	1.0331	0.000398331
Ppp4r3b	1.03124	0.0273778
Rpl29	1.03113	0.00292691
Pus7	1.03059	0.174389
Psap	1.02929	0.106683
Ufsp2	1.02415	3.22932e-07
Hivep3	1.02211	0.179144
Eif3l	1.01693	0.00293965
Ppm1g	1.01611	0.000216837
Tmed9	1.01358	0.00117212
Slc25a13	1.01338	5.33149e-05
Capza2	1.01113	0.00254694
L1cam	1.00938	0.0214368
Jmjd1c	1.00821	0.322827
Tsc22d3	1.00784	0.00129807
Dock5	1.00707	0.606645
Hars	1.00467	0.00275454
Gpm6b	1.00397	0.0643802
Fam174a	1.00293	0.00529165
Mfsd14a	1.00191	0.0154006
Sp110	1.00089	0.045077
Kpna1	0.997276	0.00819585
2700049A03Rik	0.996376	0.00196038
Klhl21	0.995777	9.45606e-05
9930021J03Rik	0.994901	0.0571624
Csnk2a2	0.993378	0.000842421
Khsrp	0.990365	0.000249264
Gusb	0.990259	0.00129213
Ilf3	0.989332	0.000183443
Kif1b	0.989117	0.380911
Rab35	0.989002	0.00483583
Pwp1	0.988611	0.00036254
Nrf1	0.982884	0.065459
Cdca4	0.982205	0.0233752
Cish	0.980489	0.0403984
Ulk2	0.976016	1
Gtpbp10	0.97578	0.000110201
Brip1	0.97561	0.00483583
Appl1	0.970228	0.0013716
Cdc27	0.970039	0.00354888
Sympk	0.968232	0.00129213
Pitpnm2	0.968192	0.00550642
Arid1b	0.964465	0.012549
Cops6	0.961433	8.65783e-07
Gnai3	0.959175	0.042029
Ksr2	0.955044	0.00132496
Map2k2	0.954861	0.0542575
Tk1	0.953584	0.000110201
AU041133	0.952324	0.00144563
Cnnm2	0.951937	0.056197
Slc16a2	0.950354	0.174389
Hnrnpf	0.950276	0.00747832
Ppp2r3a	0.949144	0.362318
Chp1	0.948856	0.108624
Ercc6l2	0.948335	0.0207074
Dnajb4	0.948176	0.00248711
E230016M11Rik	0.947612	8.65783e-07
Batf	0.94654	0.052065
Plag1	0.945339	0.00578593
Mdm2	0.944548	0.019564
Cbwd1	0.940777	0.00122162
Nup205	0.94015	0.00406573
Otud4	0.937846	0.00193269
Wdr37	0.936767	0.058579
Actr5	0.933212	8.09358e-05
Rft1	0.931915	0.00129213
Luzp1	0.930976	0.153535
Atxn7l1	0.930233	0.00507272
Tshz3	0.929328	0.010686
Wwox	0.929226	0.0143388
Ebag9	0.928657	0.0171438
Atp13a3	0.927865	0.00885501
Ywhaq	0.927717	0.0532317
Zfp458	0.926624	0.000110201
Dhx15	0.926428	0.04926
Rnf2	0.925842	0.0332622
Zfp212	0.920747	0.103793
Smarca4	0.917662	0.00569011
Odf2l	0.917325	2.84413e-05
Zdhhc21	0.916448	0.30133
Pnpla6	0.915562	0.0148148
Srgap3	0.915227	0.0352999
Zfp934	0.914675	0.00750852
Rab5if	0.91169	0.00112578
Fam3c	0.910734	0.0935806
Trmt61b	0.910519	0.00293965
Txndc11	0.910194	0.00260493
Rad51b	0.909251	0.27473
Arf1	0.908796	0.00350436
Cdc34	0.908616	8.65783e-07
Nus1	0.90831	0.0293174
Rnf214	0.908146	0.00036254
Mark3	0.908054	0.0328669
Paqr8	0.906587	0.0994092
Casz1	0.906498	0.0233752
Shoc2	0.905662	0.00423678
Top2b	0.904933	0.0546149
Cacybp	0.904329	0.0174295
Hpcal1	0.904074	0.131767
Rac1	0.903602	0.428225
Syncrip	0.902997	0.0125561
Srsf10	0.902913	0.363115
Rnf4	0.899695	0.0579681
Gtpbp1	0.899101	0.0134571
Ccpg1	0.898433	0.00260879
Nhlrc2	0.896899	0.0105667
Mtdh	0.895738	0.167122
Tgif2	0.894969	0.0258326
Fbxw2	0.894575	0.052065
Tanc1	0.894031	0.00479366
Rpl18a	0.893682	0.00868161
Adgrg5	0.89253	7.69227e-06
Strap	0.892234	0.0276284
Tmem154	0.892114	0.239945
Arpc2	0.891955	0.0105306
Dpy19l1	0.890954	0.010686
Hspa9	0.884116	0.132402
Ldha	0.883466	0.300244
Kmt5a	0.882443	0.0165368
Grk5	0.880447	0.0683051
Smg5	0.879591	0.00959992
D830030K20Rik	0.878705	0.0233752
Cnot6	0.877584	0.185136
Tada2a	0.876275	0.00578593
Pank3	0.875769	0.00249493
Tbck	0.875653	0.468722
Chpt1	0.874938	8.65783e-07
Rpl28	0.874179	0.0119706
Wdr82	0.872955	0.131667
Krtcap3	0.872392	0.0233752
Rbak	0.871487	9.45606e-05
Smarce1	0.870468	0.0277343
Ptdss1	0.870467	0.00036254
Alg2	0.868785	0.00632147
Pde4b	0.868476	0.0773658
Tmem243	0.868146	0.0332622
Psmg4	0.867561	8.65783e-07
Tmtc4	0.867503	8.65783e-07
Shf	0.865592	0.0233752
Ino80dos	0.86559	0.00578593
Dzip3	0.863868	0.171671
Itfg2	0.861752	0.174389
Fam83d	0.859926	0.0331993
Psmd1	0.859707	0.0161012
Abcb1a	0.859296	0.219665
Ddx54	0.858373	0.0493147
Ankrd52	0.857897	0.0148148
Ssr3	0.854726	0.00406573
Parn	0.854654	0.00429694
Eif2ak3	0.854265	0.0372253
Plagl1	0.853887	0.00143631
Plxnc1	0.852515	0.099742
Proser1	0.851959	0.000916444
Zscan18	0.84964	0.0233752
Slc16a6	0.849635	0.0148709
Zdhhc2	0.848077	0.00639036
Pom121	0.846243	0.0319476
Tcf7l1	0.845256	0.0233752
Fto	0.844845	0.0310154
Galnt7	0.843738	0.163141
Kcnk5	0.84358	0.00293965
Aagab	0.841712	0.0156844
Anapc4	0.841315	0.0165368
Apbb3	0.840035	0.00632147
Pcgf6	0.839923	0.0898348
Sugct	0.838364	0.174389
Styx	0.836878	0.052065
Iqcd	0.836042	0.000564389
Plekha5	0.835802	0.100498
Rnf125	0.835117	0.0234659
Acox1	0.833648	0.643637
Psmb7	0.832691	0.0633021
B3glct	0.832248	8.80861e-06
Lcp1	0.832229	0.0161569
Tnfsf8	0.829806	0.335291
Hsd17b4	0.829586	0.00315774
Pwp2	0.829301	0.00115381
Ate1	0.829229	0.0148148
Accs	0.828925	0.00132496
Myh10	0.827979	0.000564389
Bloc1s5	0.827735	0.000564389
Rapsn	0.827218	0.000564389
Klhdc3	0.827005	9.04118e-05
Tollip	0.826599	0.000110201
Nr2c2	0.826512	0.120686
Fam193b	0.826493	0.00454001
Dedd2	0.824854	0.0331993
4933433G15Rik	0.824431	0.000564389
Mafg	0.820659	0.0159419
Api5	0.820106	0.00235005
Shank2	0.819867	0.000564389
Cnnm3	0.819717	0.00144563
Sntb2	0.819063	0.455008
Sec61a2	0.818702	0.00132496
Fgf7	0.817196	0.0233752
Nck1	0.81536	0.0140064
Ppm1a	0.815054	0.0121718
Rab2b	0.814629	0.00627853
Vsir	0.814151	0.0214368
Ccdc171	0.812407	0.00490519
Inafm2	0.810852	0.000564389
Hp1bp3	0.80912	0.0129376
Cct4	0.808556	0.0155958
Fmnl1	0.808288	0.00211346
Anapc7	0.807518	0.0148148
Dis3	0.807389	0.00339049
Usp12	0.807365	0.280818
Srsf1	0.806972	0.0328669
Ndst2	0.806768	0.000564389
Tomm34	0.805967	0.0822456
U2af1	0.805258	0.011619
Kras	0.80525	0.00960785
Ppil6	0.805114	0.00578593
Cdc25b	0.805111	0.000110201
Zfp652	0.8049	0.0190499
Mtpn	0.804808	0.0190288
Clec16a	0.804416	0.00171346
Ddi2	0.80373	0.0285438
Arl5a	0.803564	0.17806
Grk6	0.802974	0.060866
Enkur	0.799856	0.000398331
Aig1	0.799404	0.450353
Sgta	0.798063	0.00129213
Aim2	0.797454	0.0387965
Rin3	0.797395	0.460891
Pls3	0.797245	0.000564389
Ccdc66	0.796861	3.22932e-07
Zfp251	0.794769	0.26965
Gtpbp3	0.793194	0.0233752
Pja2	0.793149	0.0518302
Timm44	0.792483	0.00578593
Tuba4a	0.791144	0.0183643
Fam184a	0.791071	0.000564389
Kcnq5	0.790576	0.259063
Slu7	0.790479	0.0214368
Nup210	0.790153	0.00982727
Atxn2l	0.790042	0.00315987
Apc	0.789005	0.16638
Zfp362	0.788432	0.0233752
Mtrf1l	0.788387	0.00578593
Enox2	0.788092	0.107369
Vdac1	0.787812	0.0148148
Lonrf3	0.787729	0.325158
Kansl1l	0.787393	0.08944
Clpb	0.787116	0.0352999
Atp5l	0.787032	0.0490128
Ints4	0.786971	0.133409
Zfp330	0.786848	0.0549424
Nfia	0.786598	0.090378
Suds3	0.786402	0.0466874
Snrk	0.786094	0.325158
Cfdp1	0.785454	0.171671
Ddx39b	0.785407	0.0334689
Zfp329	0.784655	0.0331993
Clcn3	0.784416	0.0100821
Abhd10	0.784054	2.71994e-07
Tmem164	0.782302	0.15469
Naa25	0.781873	0.0174295
Slc25a26	0.780713	0.0352999
Nmnat3	0.780448	0.0331993
Crebbp	0.777369	0.0539313
Galt	0.777043	0.0233752
Kif15	0.776341	0.26965
Zc3h12d	0.776028	0.251632
Mfsd2b	0.775972	0.0233752
Celf2	0.775766	0.0198427
Slc16a10	0.775765	0.240846
Mrpl30	0.775302	0.00529165
Atad3a	0.775287	8.09358e-05
Chmp4b	0.774543	0.371623
Calr	0.774273	0.035747
Vps35	0.774118	0.0549424
Nudt21	0.7741	0.0067746
Rai1	0.772884	0.0892853
Rabggtb	0.772415	0.00012826
Arrdc3	0.771699	0.0431776
Lztfl1	0.770279	0.0193427
Zfp661	0.770223	0.000564389
Dhx36	0.76935	0.0120141
Spop	0.766836	0.0749783
Sfswap	0.766398	0.0158909
Xrcc5	0.766281	0.0470465
B4galt3	0.764501	0.0233752
Lrrc20	0.763342	0.0331993
Gtdc1	0.763062	0.178493
Zfp963	0.761552	0.02629
Ccp110	0.761533	0.0233752
Mrpl14	0.759465	0.000110201
Gpatch1	0.759169	0.00529165
Sh3bgrl3	0.758847	0.413123
Cyp4f13	0.758189	0.0375129
Immp2l	0.757683	0.524384
Rnf166	0.756498	0.255197
Mrfap1	0.755842	0.00363875
Kif20b	0.755833	0.0857421
Cog5	0.75382	0.1039
Phf8	0.753368	0.011773
Myo1f	0.751971	0.935834
Arhgef7	0.751678	0.0141947
Sft2d1	0.751293	0.000743581
Eepd1	0.750531	0.000480029
Farp2	0.750517	0.174389
Narf	0.750463	0.227013
Rac2	0.750256	0.370431
Rif1	0.750194	0.0181635
Odf2	0.750095	0.00390344
Mkrn2	0.749103	0.153535
Slc6a6	0.748123	0.333213
Fosl2	0.7478	0.195669
Ldlr	0.747106	0.0375129
Nt5e	0.745906	0.143594
Sec31a	0.744056	0.161815
Rps8	0.743753	0.049816
Tubb4a	0.742523	0.02629
Pex13	0.742461	0.056197
Pitpnm1	0.741305	0.00297998
Qtrt2	0.74122	0.00036254
Sytl3	0.740777	0.545259
Ifngr2	0.740531	0.0898348
Il20ra	0.740036	0.0233752
Tmem29	0.739571	0.00129213
Ubl3	0.73844	0.163867
Slc25a17	0.738423	0.103793
Atp6v1b2	0.738354	0.545259
Dbnl	0.737626	0.153535
6330418K02Rik	0.736883	0.0871946
Inpp1	0.73586	0.00339049
Sec23b	0.735498	0.000916444
Pik3r5	0.734506	0.0902481
Rrbp1	0.734257	0.00690913
Noc3l	0.732459	8.09358e-05
Farsb	0.731622	0.0539767
Mon2	0.731068	0.210427
Zfp444	0.730321	0.00129213
Samm50	0.72915	0.00129213
Flna	0.729094	0.152802
Nr4a2	0.728518	0.742395
Dact3	0.72836	0.000564389
Zbtb44	0.727042	0.00825404
Morn4	0.726039	8.65783e-07
Stx4a	0.725947	0.122886
Mpp2	0.725865	0.000564389
Trappc2l	0.725519	0.00129213
Slc12a7	0.725008	0.460891
Gm19951	0.724736	0.0667096
Ammecr1l	0.724499	0.0290821
1110038F14Rik	0.724306	0.0871946
Rad52	0.724293	0.174389
Rc3h2	0.723262	0.0718412
Gm26628	0.722568	0.000564389
Zfp398	0.722029	0.0304859
Gsn	0.721811	0.0871946
Slfn3	0.720282	0.02629
4931406C07Rik	0.720055	0.02629
Vwa3b	0.71969	0.000564389
Txndc16	0.718691	0.158061
Bin2	0.718324	0.144928
Tspan13	0.71824	0.0639274
Terf2	0.71785	0.122886
Rab1a	0.716656	0.0134108
Bcl10	0.716134	0.219665
B230216N24Rik	0.715079	0.02629
Nbas	0.714569	0.0551494
Slc38a1	0.714203	0.257013
Rbm6	0.713305	0.0555672
Sgk1	0.713032	0.00354966
Foxn2	0.712004	0.062082
Vps39	0.711766	0.0203663
Bzw2	0.711371	0.104336
Pigu	0.711049	0.0159419
Srpk2	0.710864	0.0578316
Mkks	0.710714	0.000564389
Tmem201	0.710687	8.65783e-07
Ilkap	0.709522	0.0193427
Slc12a9	0.709203	0.0871946
Zfp655	0.708985	0.00168531
Zcchc2	0.708672	0.0191916
Scaf11	0.708273	0.0197143
Rnpc3	0.70825	0.0346645
Chchd4	0.707954	0.000564389
Umad1	0.707513	0.140277
Mrps21	0.707351	0.0871946
Procr	0.707332	0.000564389
Exosc5	0.706668	0.00161578
Hspd1	0.705414	0.00591658
Metrn	0.705267	3.22932e-07
Pcbp3	0.704076	0.0150076
Prkd2	0.703866	0.0177965
Cep55	0.701936	0.00129213
Fgfr1op2	0.70176	0.178054
Taf10	0.700768	0.26965
Bod1l	0.700572	0.20564
Slc25a32	0.700126	0.0940834
Lyn	0.699856	0.0857421
Kif21b	0.699602	0.197912
Ppp2r1a	0.698839	0.185481
Vrk1	0.698108	0.314206
Dhx16	0.69722	0.00161578
Arl8a	0.697077	0.00632147
Eps15l1	0.696305	0.00431359
Ube2g2	0.696029	0.174389
Lats1	0.695065	0.0093718
Spry1	0.694998	0.365198
Tpra1	0.694915	0.000564389
Vps4a	0.694653	0.0871946
Lamb3	0.694265	0.0857421
Ccdc43	0.693833	0.000110201
Polr2f	0.693443	0.00161578
Il2rb	0.692177	0.119758
Cpped1	0.691922	0.0942873
Rwdd4a	0.690628	0.000437403
Peli2	0.690163	0.02629
Camkk2	0.690148	0.0857421
Sdcbp2	0.688728	0.00115381
Usp46	0.688446	0.174389
Slc23a1	0.68831	0.0942873
Cdk7	0.688159	0.0898348
Abi3bp	0.686773	0.877109
Pgm1	0.686219	0.195819
Ireb2	0.686066	0.00945353
Zc3h11a	0.685825	0.174389
Zbtb2	0.685068	0.113022
D030028A08Rik	0.684687	0.0233752
Itgb3	0.684404	0.239945
Tet2	0.684292	0.0407438
Cnksr3	0.683196	0.191983
Cdk5rap1	0.682748	0.174389
Fam174b	0.68266	0.0233752
Zfp91	0.682644	0.0130804
Aven	0.68212	0.167394
Acaca	0.681342	0.0842376
Cabin1	0.681142	0.0415834
Bcar3	0.680594	0.0871946
Sfmbt2	0.680451	0.00768178
Brox	0.679821	0.0150076
Armc10	0.67957	0.0233752
Slc35e3	0.679492	0.0233752
Numa1	0.679019	0.0266617
N4bp2l2	0.677425	0.162259
Agfg2	0.676938	0.0141947
Stap1	0.676936	0.0191916
Acot2	0.676749	0.0871946
Morf4l1	0.67577	0.0375479
Tspan14	0.675077	0.00561118
Ppp4r1	0.67478	0.0345411
Emc2	0.674752	0.0350517
Ubald1	0.674551	0.0171438
Zbtb17	0.674067	8.65783e-07
Zwilch	0.6737	0.00012826
Mib1	0.67367	0.000721486
Map4	0.673361	0.0528204
Stab2	0.673143	0.02629
Egln2	0.672839	0.0233752
Gpr160	0.672638	0.0233752
Arl2bp	0.671324	0.0942873
Ggt5	0.671014	8.65783e-07
Ppp5c	0.670598	0.00578593
Pqlc3	0.670557	0.0159419
Mgat4a	0.670443	0.162681
Rmi1	0.670256	0.174389
Pcnt	0.669736	0.0225136
Lsm4	0.668359	0.0871946
Rnf34	0.668202	0.19865
Strn	0.667886	0.0497079
Copz1	0.666989	0.0942873
Anxa2	0.666341	0.0113188
Cops5	0.666285	0.0780088
Echdc1	0.666236	0.0148148
Pfkp	0.664415	0.0222678
Mns1	0.66419	0.0171438
Utp6	0.66393	0.00315774
Vezf1	0.663778	0.00596487
Ccr7	0.663484	0.014667
Eif3e	0.663132	0.233317
Ddx23	0.662895	0.0898348
Stx6	0.662887	0.113022
Cmss1	0.662254	0.0477589
Vps33a	0.661918	0.00115381
Zfp672	0.661835	0.0871946
Fxr1	0.66147	0.0329794
Ercc6	0.661368	0.0133721
Map2k5	0.661045	0.0594242
Dnajc15	0.660845	0.0818013
Ccdc7a	0.660449	0.00012826
Srsf6	0.660329	0.0455813
Vcpip1	0.660326	0.0749783
Trim68	0.660005	0.0233752
Hk2	0.65999	0.0579512
Slc35e2	0.659685	0.0093718
Setx	0.65942	0.308427
Aurkaip1	0.657641	3.22932e-07
9030624G23Rik	0.657638	0.0233752
Foxj3	0.656813	0.0299555
Gm8251	0.65659	0.0375129
Thoc1	0.656367	0.116417
Ahctf1	0.656335	0.0339479
Rabl6	0.65589	0.00363875
Ttl	0.655143	0.0233752
Rbis	0.655094	0.0159419
Ptch1	0.654947	0.0334689
Nr4a1	0.654902	0.906166
Mdc1	0.654755	0.0159419
Prc1	0.654601	0.00441583
Rps28	0.654488	0.0516074
Nfatc1	0.653173	0.065906
Ipo11	0.653092	0.0573272
Tnfaip1	0.652474	0.0871946
Dtl	0.652172	0.0533939
Rubcn	0.65172	0.00632147
Ap1m1	0.651715	0.26965
Them4	0.650835	0.000577147
Cds2	0.650697	0.00479547
Ncoa6	0.650446	0.131767
Nkg7	0.649888	0.174389
Ing5	0.649853	0.0233752
Lrpprc	0.648817	0.0299555
Rufy2	0.648743	0.0898348
Ssr4	0.648355	0.0171438
Arl6ip6	0.64825	0.778395
Cyth4	0.648191	0.036217
Il1r1	0.647883	0.545259
E2f5	0.647543	0.174389
Myo1e	0.647029	0.0719714
Hmgcl	0.646782	0.174389
Edf1	0.646487	0.0431776
Purb	0.646457	0.167333
Mphosph8	0.646439	0.046366
Zfp975	0.646284	0.26965
Usp19	0.646157	0.00529165
Rnf103	0.645382	0.496072
Aph1a	0.645279	0.00129213
Rgl2	0.644355	0.00752828
Zfp560	0.643923	8.65783e-07
Lamp1	0.64392	0.045077
Rph3al	0.643857	0.0940834
Rnf146	0.643786	0.100259
Hip1r	0.643684	0.0244553
Abce1	0.643218	0.0126848
Cct2	0.642979	0.0161012
Zfp207	0.642808	0.0302619
Mrps24	0.642472	0.0352999
Rufy3	0.641909	0.0159419
Pias2	0.641041	0.0678466
Srbd1	0.640325	0.636123
Bsg	0.640095	0.0352999
Mex3b	0.63975	0.0051461
Fh1	0.639457	0.0233752
Arhgap20	0.639297	0.26965
Lin54	0.638441	0.0658518
Atp5d	0.638299	0.00390344
Hdac1	0.638256	0.0737742
Lrrk2	0.63807	0.0233752
Ntan1	0.636632	0.0940834
Ciapin1	0.636425	0.0352999
Fam89b	0.636203	0.000110201
Sap30bp	0.635609	0.0549424
Ap1s1	0.634853	0.00144563
Tbcel	0.634806	0.159411
Dld	0.634691	0.00806595
Aatf	0.633733	0.0834074
Prpf6	0.63352	0.165455
Rad50	0.633418	0.0431289
Fam32a	0.633193	0.0159419
Ankrd13d	0.631764	0.00144563
Dimt1	0.631752	0.0871946
Lsm1	0.631576	0.00122162
Tor3a	0.630673	0.282455
Topors	0.630062	0.159411
Magoh	0.629971	0.0126848
Zfpm1	0.627966	0.0331993
Cul3	0.627202	0.127661
Clptm1	0.627025	0.0319476
Specc1	0.626838	0.365198
Ap3b1	0.625945	0.0659856
Ifi214	0.624968	0.02629
Eipr1	0.624934	0.022556
Rab23	0.624857	0.00578593
Hmg20a	0.62406	0.266926
Map4k3	0.623683	0.219665
Mtpap	0.623629	0.00034631
Zfyve1	0.623517	0.26965
Surf6	0.623243	0.00578593
Myo5a	0.62306	0.268353
Fbxw11	0.623006	0.555607
Fam76a	0.622934	0.0871946
Ubap2l	0.621849	0.0582902
Snw1	0.621703	0.0218382
Desi2	0.621121	0.00334839
Fancc	0.621053	0.185848
Nono	0.620887	0.266875
Gm7072	0.620469	0.0171438
Arhgef10	0.62045	0.184874
Cdkl3	0.619381	0.174389
Tyw1	0.61931	0.365198
Zfp738	0.618823	0.00752828
Sf3b2	0.618339	0.0480598
Trpm7	0.617677	0.0417848
Naip5	0.617539	0.184874
Rad21	0.617141	0.333213
Prelid2	0.616982	0.0711695
Brwd3	0.616565	0.13309
Pou2f1	0.615555	0.268177
Ankfy1	0.615479	0.0823265
Ikzf2	0.6154	0.849428
Anxa5	0.61509	0.365198
Ezr	0.615005	0.0924273
Snx5	0.614665	0.286229
Cox4i1	0.614639	0.0316774
Ccdc124	0.614204	0.0871946
Tecr	0.613329	0.0579512
Polr2e	0.61329	0.000437403
Itfg1	0.613169	0.0479487
Nampt	0.612748	0.255086
Ankhd1	0.612262	0.132738
Arg2	0.612085	0.00012826
Adss	0.611957	0.0781925
Atf6	0.6118	0.596033
Lpxn	0.611728	0.0639274
Nop58	0.611486	0.43714
Nars	0.611399	0.095862
Tap1	0.610947	0.0604413
Ski	0.610945	0.153422
Ifit2	0.610877	0.0871946
St7	0.61085	0.088432
Tmem181a	0.610684	0.0610957
Rasgrp2	0.610614	0.229631
Got2	0.610152	0.0493147
Cops2	0.610089	0.0350517
Npm1	0.609852	0.0841276
Exosc1	0.60975	0.0579512
Sirt1	0.609601	0.102819
Ube2s	0.609574	0.227064
Mrps34	0.609294	0.00115381
Ccr9	0.609131	0.00632147
Tatdn2	0.608857	0.37947
Ppcs	0.608042	0.174389
Arglu1	0.607928	0.0320881
Spag7	0.607891	0.174389
Entr1	0.607396	0.0610957
Ube4a	0.607171	0.554169
Mpzl3	0.606844	0.00144563
Erp44	0.606766	0.0859685
Atxn7l3	0.60612	0.365198
Eml4	0.605039	0.768281
Rfwd3	0.60471	0.0579512
Smarcc2	0.603273	0.00564177
Dynlt1b	0.603055	0.02629
Rbm14	0.603021	0.00564177
Psmb9	0.602955	0.0249476
Ywhae	0.60261	0.162259
Drosha	0.60235	0.219665
Ppp2r5c	0.602261	0.0767085
Arfgap2	0.601643	0.000110201
Snx29	0.601315	0.318772
Nfs1	0.601186	0.00390344
Tpr	0.598354	0.161745
Aco1	0.597892	0.174389
Stard7	0.594533	0.00144563
Emg1	0.593579	0.103063
Agk	0.593527	0.0470465
Ankrd17	0.593429	0.177548
Atg14	0.593363	0.184874
Akt1s1	0.593119	0.00129213
Cdc14a	0.592621	0.129584
Rpl30	0.592153	0.443614
Nol10	0.590776	0.239945
Haus8	0.590164	0.174389
Tardbp	0.590014	0.194163
Pphln1	0.589831	0.014667
Rgs19	0.588571	0.0871946
Nudt19	0.587538	8.65783e-07
Lamtor5	0.586437	0.0610957
Gm47283	0.586329	0.36593
Ube2z	0.58589	0.0312066
Washc4	0.585844	0.00933619
Gna14	0.585102	0.0942873
Mtmr4	0.58446	8.65783e-07
Slc25a42	0.584353	0.282455
Nipsnap3b	0.58417	0.0942873
Rtp4	0.584161	0.02629
Prpsap2	0.583661	0.0539767
Pds5b	0.583537	0.176145
Cct5	0.583204	0.036698
Agap2	0.58306	0.00144563
Zfp740	0.582809	0.365198
Mir155hg	0.582508	0.389578
Wbp2	0.582355	0.174389
Lsm6	0.582132	0.159411
Eloc	0.581057	0.0387413
Mbnl1	0.581006	0.0829623
Dera	0.580894	0.0249476
Smyd2	0.580143	0.000100929
Dnm2	0.580047	0.142279
Eif4g2	0.580029	0.0979558
1700109H08Rik	0.57987	0.0072154
Sar1b	0.579817	0.122886
Prkrip1	0.579309	0.000100929
Mettl15	0.579003	0.19865
Ubac1	0.578439	0.00752828
Map9	0.577126	0.000564389
Birc6	0.576742	0.144096
Frg1	0.57576	0.0319476
Ndufv2	0.575305	0.21249
Cd48	0.574684	0.0590461
Ethe1	0.574492	0.282455
Tstd2	0.57448	0.0352999
Fam120c	0.574194	0.0768342
Psmb6	0.574159	0.0137585
Mkln1	0.573279	0.380515
Osbpl5	0.573108	0.0171438
Csgalnact2	0.572708	0.0984916
Mettl6	0.572391	0.0375129
Tbc1d23	0.572079	0.185848
Zfp169	0.57153	0.184874
Fcho1	0.571041	0.000437403
Ptma	0.57053	0.113066
Prpsap1	0.570504	0.00182417
Trim65	0.570439	0.0942873
Rab14	0.570338	0.23346
Cd226	0.570203	0.654813
Mogs	0.570114	0.00161578
Cdc73	0.5698	0.0864214
Sec22a	0.569651	0.0684682
Mmaa	0.569456	0.0678091
Wwc2	0.569401	0.00632147
Cenpl	0.569319	0.0159419
Prkx	0.569232	0.0401889
Atxn2	0.569035	0.168219
Fbxo32	0.568744	0.26965
Abhd6	0.56838	0.0352999
Lpgat1	0.568279	0.0711695
Vwa5a	0.567971	0.0212388
Sec62	0.567676	0.241
Cct8	0.567116	0.103737
Kmt2a	0.566352	0.220362
Pop5	0.565116	0.365198
Tut4	0.565112	0.0703788
Zfp407	0.564555	0.240717
Mapre1	0.563704	0.0211041
Utp14a	0.563572	0.0898348
Lbr	0.562956	0.117486
Snx17	0.561696	8.65783e-07
Zfp472	0.561666	0.282455
Atp2b4	0.561639	0.238409
1110059E24Rik	0.561222	0.0150076
Sgsm3	0.560925	0.0942873
Ercc8	0.560704	0.00578593
Stard3	0.559942	0.174389
Ptk2b	0.559835	0.496449
Sltm	0.559457	0.642127
Nup107	0.5591	0.00161578
Fbxo9	0.559026	0.37947
Noc2l	0.558883	0.365198
Araf	0.558204	0.011971
Micos10	0.558185	0.0420374
Extl3	0.557596	0.103737
Rab5a	0.557076	0.253205
Auh	0.556429	0.0690592
Ptprs	0.556251	0.171671
Il18rap	0.556126	0.100259
Ltbp1	0.555741	0.000564389
Ehmt2	0.555625	0.0067746
Cpq	0.555186	0.343228
Aldh4a1	0.554986	0.00168531
Hmmr	0.554837	0.174389
Dzip1	0.554648	0.472669
Ruvbl2	0.554154	8.65783e-07
Snx18	0.554109	0.105722
Atp1b1	0.553644	0.128063
Ppard	0.553362	0.0331993
Ap2a2	0.553333	0.0875421
Anapc5	0.553286	0.110982
Asxl2	0.55302	0.225907
Mex3c	0.552215	0.617114
Slc25a36	0.552203	0.047052
Mysm1	0.55206	0.0690592
Lef1	0.551893	0.503035
Klf6	0.551623	0.129379
Synj2bp	0.550903	0.0413631
Cdc37	0.550895	0.21249
Gprin3	0.550818	0.396953
Hsf1	0.550802	0.0398429
Rnasek	0.550399	0.26965
B4galnt1	0.550348	0.425511
Dennd5a	0.550327	0.0202726
Mdm4	0.550279	0.200869
Prkcb	0.549292	0.199304
Midn	0.549227	0.0350517
Canx	0.549051	0.0961145
Smcr8	0.548809	0.0942873
Inppl1	0.548691	0.000564389
Tbc1d12	0.548467	0.271109
Rnf43	0.548435	0.0420374
Vta1	0.54834	0.238409
Zfp26	0.548272	0.0984916
Rabepk	0.548066	0.0610957
Yipf5	0.547744	0.133409
Rhobtb2	0.547364	0.00161578
Nek7	0.546913	0.552116
Phtf1	0.546224	0.105722
Map3k7	0.546223	0.0667096
Pde6g	0.546148	0.000564389
Tmem126b	0.546018	0.174389
Psmd6	0.545657	0.00632147
Rnf111	0.545539	0.040678
Cul5	0.545365	0.614155
Prkacb	0.543972	0.22527
Dipk2a	0.543856	0.266875
Farp1	0.543696	0.110226
Ndufb10	0.543538	0.00632147
Xpnpep1	0.543404	0.365198
Mthfr	0.543154	0.0898348
Lcor	0.542968	0.283475
Bcl2l12	0.542955	0.0171438
Coq9	0.542939	8.65783e-07
Raly	0.542536	0.0342231
Nup188	0.542491	0.00578593
Chrna9	0.542418	0.184874
Senp2	0.541599	0.276379
Phka2	0.54129	0.545259
Rac3	0.541238	0.000564389
Tnks2	0.541121	0.181536
Nipsnap2	0.54072	0.0141947
Slmap	0.540698	0.144273
Socs6	0.539305	0.0375129
Lrrc14	0.539016	8.65783e-07
Eif2b4	0.538315	0.0184244
Sbf1	0.538274	0.0334689
Retreg2	0.537821	0.37947
Ccdc134	0.537652	0.00632147
Alyref	0.537332	0.335291
BC035044	0.537019	0.000564389
Rev1	0.536624	0.105546
Slc44a1	0.536585	0.138926
Itpr1	0.536564	0.307852
Mbip	0.536364	0.0579512
Chchd2	0.536035	0.0736617
Arfip2	0.536023	0.184874
Suclg2	0.535671	0.254183
Slc25a4	0.53551	0.219665
Ap3s1	0.53539	0.00862492
Tkt	0.535372	0.21249
Stx11	0.535144	0.00376052
Ppp3cc	0.534964	0.11216
Ifnar1	0.534882	0.31368
Klhl9	0.534709	0.0984916
Mrpl4	0.53448	0.0184244
Ddx17	0.534465	0.14243
Ppp1r7	0.534407	0.0579512
Gatad2a	0.534328	0.282595
Pycard	0.534178	0.00869637
Kdm4c	0.533512	0.510912
Park7	0.533386	0.37947
Nlrp1b	0.532852	0.26965
Bcas2	0.53266	0.17806
Armc7	0.532467	0.184874
Plekhg5	0.531239	0.0233752
2700062C07Rik	0.530236	0.184874
Emc1	0.529989	0.00012826
Ogfod3	0.529746	0.000564389
Mtf2	0.529581	0.12186
Dnajc25	0.529204	0.457538
A630072M18Rik	0.528806	0.282455
Ergic2	0.52855	0.123662
Ube2r2	0.528426	0.967026
Ikbkb	0.528137	0.136636
Acly	0.52789	0.0272048
Gps2	0.527775	0.00390344
Ddx21	0.52724	0.248886
Sec61a1	0.526921	0.0968737
Mdh1	0.526663	0.122591
Armc5	0.525562	0.000564389
Cep164	0.525296	0.00632147
Rbm4b	0.524977	0.0352999
Ccin	0.524675	0.000564389
Hipk1	0.524525	0.0444166
C530005A16Rik	0.524344	8.65783e-07
Gdpd5	0.524215	0.0331993
Dync1h1	0.523093	0.0760553
Bud31	0.522693	0.37947
Nisch	0.522158	0.14794
Gclc	0.522112	0.136906
Xpot	0.521897	0.0237257
Pop1	0.521448	8.65783e-07
Cox16	0.520617	0.179097
Pheta1	0.520577	0.000564389
Cdk12	0.520536	0.0408527
Reep2	0.520482	0.000564389
Rcc1l	0.520442	8.65783e-07
Eif4ebp2	0.520287	0.0292123
Cdc40	0.520237	0.144688
8030462N17Rik	0.520063	0.087364
Smg8	0.519822	8.65783e-07
Fbxo3	0.519582	0.00339049
Polr2j	0.519033	0.000110201
Add3	0.518882	0.204263
Carnmt1	0.518764	0.0369416
Drg1	0.518748	0.0214368
Cd37	0.518504	0.046366
Klre1	0.518015	0.0233752
Rps27rt	0.517757	0.0119845
Stc1	0.517732	0.000564389
Nemf	0.517557	0.11862
Slain1	0.517103	0.221079
Erp29	0.516932	0.472669
Slc25a5	0.516544	0.00144563
Atp5j	0.515827	0.0579512
Cchcr1	0.515826	0.000564389
Atad2b	0.51554	0.0236688
Eif2s3y	0.514789	0.0684682
Il27ra	0.514773	0.140277
Slc25a23	0.514654	0.000564389
Slc36a4	0.514607	8.65783e-07
Sav1	0.514554	0.0713869
Asb8	0.514344	0.0233752
Trim12c	0.51423	0.184624
Atp13a1	0.514148	0.00129213
Emc9	0.513879	0.0233752
Gm3558	0.513847	0.000564389
Stard4	0.513818	0.00144563
Zfp7	0.513085	0.0233752
Ccdc73	0.512957	8.65783e-07
Irs2	0.512521	0.403409
Zfp964	0.51189	0.000564389
Inafm1	0.511398	0.000564389
Prdm15	0.511264	0.00012826
Arhgap25	0.510835	0.0866804
Ncor2	0.510774	0.0401889
Susd6	0.510556	0.373301
Cdk5rap3	0.510314	0.0184244
Mtif2	0.510185	0.0227884
Smg1	0.509918	0.0628087
Gm34821	0.509614	0.000564389
Zbtb8os	0.509038	0.00144563
Stau2	0.508875	0.000564389
Mettl1	0.508678	0.0233752
Gm1647	0.50793	0.000564389
Arpc1a	0.50755	0.560826
Abhd5	0.507333	0.101928
Angptl2	0.507299	0.000564389
Tasor2	0.507186	0.0992587
Gm4876	0.507026	0.000564389
Gtf2h2	0.506815	0.171671
Atp6v0a2	0.506577	0.271109
Ppp1r15b	0.506555	0.17806
Pabpc1	0.506506	0.192082
Ddx27	0.50641	0.0331993
Nmral1	0.506201	0.000564389
Ier3	0.506029	0.0871946
Sh3bgrl	0.505479	0.2069
Kremen1	0.505463	0.17806
Sdf4	0.505223	0.0902481
Ppp1r2	0.505139	0.0413631
Ssrp1	0.504727	0.0549424
Msmo1	0.504672	0.0871946
Gns	0.50466	0.00144563
Sec23a	0.504282	0.0643802
Pcmtd2	0.502849	0.171671
Capn11	0.502648	0.195819
Sptlc2	0.50255	0.102697
Cxcl10	0.502074	0.195819
Srp72	0.502073	0.0470465
Wdr24	0.501707	0.000564389
Rbck1	0.501485	0.00768178
Dmac2	0.50117	0.00144563
Lrrfip1	0.501157	0.174531
Ccnh	0.500548	0.0678091
Ice1	0.500462	0.254085
Tiam1	0.500349	0.132893
Zfp707	0.499971	0.00012826
Ccdc88b	0.499876	0.394081
Sh3yl1	0.499554	0.000564389
Zcchc10	0.498832	0.0171438
Ankmy2	0.498772	0.0051461
Itga10	0.498761	0.000564389
Stx1a	0.498097	0.472669
Isyna1	0.497917	0.0579512
Celf1	0.497845	0.191986
Gtf2a2	0.497545	0.00480576
Fam110a	0.497408	0.000564389
Fgf13	0.497164	0.858998
Wwp2	0.496646	0.669679
Gm10785	0.496582	0.00144563
Prcc	0.496522	0.472669
Rpf1	0.496521	0.0150076
Pspc1	0.496402	0.0983958
Lnpep	0.496335	0.0671696
Nifk	0.495798	0.0233752
Ndufaf1	0.495757	0.000564389
S100a6	0.495737	0.14409
Icmt	0.495649	0.000564389
Gm26533	0.495411	0.02629
Stk11ip	0.495138	0.000564389
Cnot1	0.494992	0.331069
Avl9	0.494692	0.0727599
Myo3b	0.494642	0.381074
Ctdspl2	0.494618	0.363568
Gpr153	0.494585	0.0233752
Lhpp	0.494461	0.0233752
Ddhd1	0.494415	0.23755
Rbl1	0.494058	0.0711695
Zfp995	0.49386	0.0871946
2610206C17Rik	0.493778	0.0871946
Sec24b	0.493535	0.967026
Ppp1r12a	0.493463	0.233888
Rars2	0.492749	0.17806
Rpp14	0.492615	0.000564389
Ripk3	0.492036	0.184874
Cct3	0.49192	0.015355
Atad5	0.491486	0.282455
Cenpc1	0.49132	0.149204
Pigb	0.491312	0.0375129
Rpusd1	0.491279	0.000564389
Rgs3	0.490737	0.0553633
Map3k1	0.490621	0.0276045
Bid	0.490027	0.00632147
Hikeshi	0.489582	0.0233752
Zfp553	0.48956	0.000110201
Plxna3	0.489513	0.02629
Setd3	0.4883	0.180599
Eif3a	0.488223	0.163263
Pdzd8	0.486828	0.0635397
Nomo1	0.48599	0.00012826
Drg2	0.485946	0.00129213
Gpd2	0.485431	0.158496
Klf13	0.485277	0.181285
Huwe1	0.48527	0.0809145
Prkar2a	0.485088	0.234534
Snhg12	0.484949	0.0697961
Chfr	0.484512	0.110982
Rps4x	0.484363	0.181441
Skil	0.484328	0.112141
Trim13	0.484118	0.0233752
Gbp9	0.483926	0.545259
Irf4	0.483617	0.174389
8430429K09Rik	0.483605	0.000564389
Atrn	0.482948	0.14794
Suz12	0.482396	0.947787
Nup85	0.482153	0.00161578
Herpud1	0.481897	0.271109
Zfp619	0.481291	0.37947
Znhit6	0.481005	0.365198
Mvp	0.480392	0.103063
Iqgap1	0.479811	0.287895
Slc30a5	0.479698	0.279315
Gramd1a	0.47952	0.0393438
2410002F23Rik	0.479015	0.0401889
Phf21a	0.478997	0.189573
Catsper2	0.478959	0.0942873
Supt16	0.478467	0.0616717
Gm32687	0.478462	0.0233752
mt-Nd5	0.478107	0.469759
Itgb2	0.47809	0.985596
Gart	0.477937	0.37947
Cnot4	0.477863	0.0950937
Ubb	0.477735	0.172161
Taf15	0.477735	0.427524
Lemd2	0.477393	0.394081
Mfsd3	0.477374	0.000564389
Rplp1	0.476892	0.120767
Nckap5l	0.476809	0.0398429
1700012B07Rik	0.476598	0.0942873
Lfng	0.476517	0.986023
Rnf7	0.476514	0.00632147
Dtx3l	0.476239	0.138926
Zfp959	0.47621	0.37947
Ubr5	0.475367	0.513931
Ctr9	0.475088	0.26307
Agpat1	0.474612	0.02629
Rnaseh2b	0.47461	0.0352999
Gripap1	0.474221	0.545259
Foxred2	0.473636	0.02629
Nhp2	0.473617	0.0171438
Atp1b3	0.47349	0.169996
Usp22	0.473392	0.103063
Scaf8	0.473195	0.157289
Vars	0.47309	0.00924726
Dffa	0.472676	0.02629
Hspa14	0.472476	0.015355
Cd9	0.472392	0.0713869
Tnip1	0.472356	0.540746
Pde6d	0.471668	0.282455
Slbp	0.471009	0.0510472
Tnpo2	0.470505	0.171671
Polr3h	0.4705	0.0871946
Mtmr9	0.470452	0.00129213
Zfp266	0.470406	0.271109
Vcl	0.470335	0.184624
Calm3	0.470333	0.0375129
Chrac1	0.470243	0.0171438
Msh6	0.470029	0.560826
Hnrnpul2	0.469973	0.168061
Usp54	0.469714	0.37947
Rasal1	0.469227	0.0233752
Cdk2ap1	0.468959	0.0041855
Neu1	0.468855	0.0398429
2810004N23Rik	0.468159	0.0610957
Ttc7	0.467776	0.0697961
Ankle2	0.467767	0.325158
Ccdc6	0.467352	0.0445533
Rabep1	0.467207	0.235572
Hells	0.466927	0.144616
Btbd10	0.466905	0.0556626
Cs	0.46683	0.112712
Traf4	0.466737	0.295667
Cap2	0.466577	0.000564389
Pnpla3	0.466564	0.000564389
Il20rb	0.466462	0.371623
Axl	0.46636	0.0233752
Nde1	0.466347	0.282455
Siah1b	0.465682	0.000564389
Tmem86b	0.465327	0.472669
Mrpl23	0.465002	0.00144563
Map2k6	0.464567	0.381074
Slc27a4	0.464551	0.000564389
Stxbp2	0.464225	0.0233752
Prr33	0.46361	0.000564389
Orc1	0.463341	0.381074
Rpl6	0.463305	0.160594
H3f3a	0.463265	0.346695
Zfp942	0.462618	0.060866
Plcxd2	0.462181	0.214611
Grap	0.462081	0.627926
Mfap1a	0.461813	0.198286
Sdccag8	0.461586	0.291211
Clstn1	0.461544	0.0233752
Adipor1	0.461447	0.0171438
Twf1	0.46079	0.394081
Secisbp2	0.460742	0.560826
Impa1	0.460115	0.0398429
Ptger4	0.459724	0.0849935
Jakmip1	0.459723	0.0593487
Atp2a3	0.459535	0.192562
Sema4d	0.459533	0.583825
Vezt	0.459193	0.279315
Nat10	0.459129	0.0352999
Mki67	0.458815	0.809393
Ubtf	0.458558	0.235581
Alg12	0.458529	0.000564389
Bcr	0.458348	0.184624
Ubtd2	0.458161	0.576605
Vac14	0.458019	0.0420374
A130010J15Rik	0.457954	0.0233752
Uqcr11	0.457809	0.00012826
Cers4	0.45772	0.2069
Hmgn5	0.457702	0.971197
Dynlt3	0.457429	0.02629
Sh3bp1	0.457242	0.0171438
Abtb2	0.457242	0.86102
Dync1i2	0.457038	0.155815
Txk	0.456994	0.307719
Stmn1	0.45643	0.101928
Pusl1	0.456363	0.000564389
Rprd1b	0.456033	0.227013
Tmem147	0.455172	0.0233752
Tuba1b	0.455165	0.320545
Prkcq	0.454815	0.234392
Coro6	0.454712	0.02629
Abat	0.454695	0.02629
Tmem67	0.454691	0.0233752
Pak1ip1	0.454667	0.0262236
Pxylp1	0.454599	0.295667
Sp3os	0.454273	0.0942873
Alkbh4	0.454177	0.282455
Mrrf	0.454173	0.0233752
Me2	0.453709	0.0849019
Rsad1	0.453518	0.02629
Kif3c	0.453282	0.000564389
Asf1a	0.453137	0.0871946
Def6	0.453117	0.031346
Psors1c2	0.453083	0.0233752
Aplp2	0.452991	0.355122
Twf2	0.452633	0.227013
Nmt1	0.452611	0.475297
Zfp346	0.452232	0.394081
Nrn1	0.452137	0.02629
1810055G02Rik	0.451681	0.0233752
2410004B18Rik	0.451287	0.00578593
Psmc2	0.451161	0.0184244
Zrsr2	0.450489	0.0401889
Cmtm6	0.450367	0.0678091
Nbr1	0.450327	0.0515589
Herc2	0.450133	0.249119
Senp5	0.449964	0.223788
Ubqln1	0.449275	0.163226
Whrn	0.44916	0.107802
Klhl25	0.448948	0.0942873
Helz2	0.448557	0.234534
Slc22a21	0.448239	0.0942873
Tbc1d5	0.448061	0.459173
Tspyl2	0.447713	0.0942873
Terf2ip	0.447676	0.295667
5530601H04Rik	0.44737	0.0398429
Fam120b	0.447131	0.101928
Pcnp	0.446765	0.198953
Tbc1d13	0.446756	0.0233752
Rmnd1	0.446668	0.00752828
Pxdc1	0.446572	0.0610957
Srebf2	0.446503	0.113088
Gpr89	0.446379	0.0171438
Ica1l	0.446207	0.0942873
Psph	0.445965	0.00012826
Ppm1b	0.445906	0.245844
Bnip1	0.445724	0.0871946
Otulin	0.445634	0.037273
Syne2	0.445495	0.215294
AW146154	0.445481	0.0942873
Zfp563	0.445323	0.0871946
Relch	0.445073	0.0831907
Ccdc69	0.444675	0.295667
Slc16a5	0.444643	0.000564389
Rnf213	0.444606	0.0338402
Elac2	0.444366	0.0233752
Ccdc50	0.444145	0.543366
Utp14b	0.443882	0.627926
Rab10	0.443815	0.202535
Mthfd2	0.443531	0.0857421
Anapc10	0.443352	0.299235
Eya3	0.443274	0.15987
Rasa2	0.443249	0.2507
Scyl1	0.443214	0.0233752
Chst2	0.442636	0.02629
G2e3	0.442339	0.612141
Ube2w	0.442236	0.203928
Hibadh	0.441893	0.771042
Ift46	0.441494	0.184624
Snrpc	0.440667	0.48083
Cc2d1b	0.44049	0.0942873
Ptpra	0.440319	0.0281554
Gemin2	0.440108	0.0871946
Ndufb5	0.440062	0.103063
Msh4	0.440023	0.0871946
Tspyl4	0.439953	0.000564389
Rc3h1	0.439775	0.188641
Praf2	0.439679	0.000564389
Eif2s1	0.439603	0.11862
Mfsd4a	0.439215	0.02629
Trim5	0.439058	0.234534
Stx12	0.439049	0.0643802
Smco4	0.438928	0.0352999
Osbpl8	0.43892	0.286773
Chchd10	0.438854	0.0871946
Snx10	0.438846	0.0398429
Rgs10	0.438655	0.592528
Tnpo1	0.438592	0.0258625
Gtf3c2	0.438223	0.094988
Eif5a	0.43799	0.381074
Bri3	0.43799	0.0331993
Hnrnpc	0.437914	0.0735421
Cenpe	0.437188	0.488072
Pgm3	0.436821	0.0942873
Llgl1	0.436536	0.0871946
Ccnb1ip1	0.436468	0.295667
Kif11	0.436307	0.65951
Eif4e3	0.4356	0.0262236
Tram2	0.435369	0.394081
Mbtps1	0.435281	0.121918
Itpa	0.435225	0.00012826
Dip2b	0.434797	0.33428
Batf3	0.43472	0.000564389
Vmn2r57	0.434679	0.000564389
Ramp1	0.434544	0.0398429
Herpud2	0.434201	0.14409
Unc5a	0.434195	0.000564389
Tlr4	0.433748	0.000564389
Fundc1	0.433675	0.02629
Esco2	0.433545	0.0233752
Frg2f1	0.432923	0.000564389
Camk2b	0.432338	0.00197348
Pcgf2	0.431984	0.0233752
Pim3	0.431912	0.394081
Samd11	0.431639	0.0197879
Gadd45g	0.43112	0.000564389
Camk4	0.430775	0.934159
Rnf121	0.430654	0.0398429
3300002I08Rik	0.430543	0.174389
Pole3	0.430424	0.02629
Pnpt1	0.430315	0.0197879
Itpripl2	0.430252	0.000564389
Cox17	0.430009	0.128063
Tdp1	0.429832	0.560826
Ephb2	0.429804	0.02629
Txn2	0.429526	0.0141947
Shb	0.429524	0.02629
Pcnx	0.429518	0.31982
Rrp12	0.429208	0.00632147
Coq10a	0.429047	0.000564389
Rasgrf2	0.428945	0.295667
B4galnt4	0.428903	0.000564389
Zmynd15	0.428724	0.000564389
Ranbp3	0.428609	0.0159419
Ythdf2	0.428536	0.0383684
BC031181	0.427592	0.325158
Traf3	0.427562	0.213412
Zc3h15	0.427356	0.121918
Tmem62	0.427145	0.00197348
Exosc8	0.426805	0.0171438
Hs3st3b1	0.426713	0.560826
Tstd1	0.426563	0.000564389
Hectd4	0.426484	0.590512
Paip2b	0.426444	0.097569
Arrdc4	0.426241	0.0233752
Wipf2	0.426036	0.0439574
Smurf1	0.425459	0.555607
Mrtfb	0.425376	0.37896
Rbm5	0.42521	0.0742837
Zfp213	0.425109	0.000564389
Strn4	0.424931	0.0678091
Snhg14	0.424584	0.0233752
Filip1l	0.424501	0.71464
Penk	0.42424	0.02629
Ift20	0.424092	0.00161578
Gla	0.423455	0.150484
Socs1	0.423129	0.287688
Brat1	0.422212	0.0942873
Msh3	0.42216	0.0760264
Ext2	0.421961	0.271109
Tab2	0.421696	0.129379
Cnot3	0.421571	0.0798015
Nsun4	0.421239	0.65951
Ube3b	0.421221	0.0610957
Map4k4	0.421063	0.0233762
Frmd6	0.420682	0.0603142
Galnt6	0.420473	0.0821029
Msh2	0.419972	0.0580111
Map4k2	0.419963	0.723912
Ndufs1	0.419582	0.0262236
Hnrnpm	0.419483	0.379985
Rnf181	0.419148	0.37947
Aspm	0.419052	0.0375129
Mecr	0.418229	0.00144563
Dennd1b	0.418116	0.535519
Ptbp2	0.417641	0.442446
Cdca2	0.417096	0.0233752
Rhbdd2	0.416578	0.0942873
Rps6kb2	0.416525	0.409027
Ssbp1	0.416386	0.0739575
Slc3a1	0.416339	0.472669
D17H6S53E	0.416289	0.02629
E130307A14Rik	0.416088	0.218052
Ccdc115	0.416071	0.000564389
Dus1l	0.41581	0.00144563
Med17	0.415691	0.545259
Parp8	0.415631	0.0852385
Hnrnph2	0.415428	0.24164
Rxra	0.414934	8.65783e-07
Snap23	0.414908	0.472669
Snrpg	0.414624	0.0675263
Yme1l1	0.414278	0.325738
Arhgef11	0.413783	0.180599
Rab3gap1	0.413734	0.246598
Stag1	0.412997	0.279612
Bet1l	0.412543	0.488072
Slc2a1	0.412435	0.296229
Ostc	0.412399	0.0158611
Elmo1	0.41211	0.219663
Bbx	0.411961	0.346813
Gpr83	0.411661	0.503741
Fbxl20	0.411644	0.612141
Htatsf1	0.41156	0.00632147
Ctss	0.411477	0.144688
Timm23	0.411474	0.0497264
Xpo1	0.410965	0.126046
Tssc4	0.410927	0.00752828
Sec24c	0.410599	0.171671
Ndufa10	0.41049	0.00924726
Psmd14	0.410452	0.192654
Rap2c	0.410333	0.0184244
Trappc9	0.409995	0.564424
Zfp945	0.409981	0.643637
Tmem167b	0.409927	0.02629
Dhx9	0.409909	0.557711
Crtap	0.409723	0.000564389
Commd2	0.409676	0.0233752
Mthfd1l	0.409234	0.451232
2700097O09Rik	0.409092	0.0171438
Siah1a	0.409057	0.643637
Acaa2	0.40856	0.0233752
Cxcr6	0.408089	0.52208
Gucd1	0.407969	0.0871946
B3gnt2	0.407882	0.204232
Gbe1	0.407795	0.163534
Nfyc	0.407666	0.25671
Adgrl1	0.407647	0.182184
Lypla2	0.407378	0.101835
Trappc13	0.407197	0.409027
Stk39	0.407112	0.55038
Cntrl	0.407069	0.335318
Map3k14	0.406589	0.531788
Slk	0.40617	0.716893
Acadvl	0.405857	0.0233752
Eif4ebp3	0.405844	0.000564389
Kat6a	0.405756	0.252286
Tdrd7	0.405752	0.101835
Pcmt1	0.405725	0.203369
Senp7	0.405541	0.0792146
Vwa8	0.405482	0.139993
Phf23	0.405477	0.101835
Nelfa	0.404799	0.0643802
Focad	0.404769	0.067416
Pkp4	0.404676	0.0388153
Rnf38	0.403935	0.18289
Sart3	0.403852	0.00161578
Tmx2	0.40385	0.02629
Cltc	0.403582	0.092526
Fbxo22	0.403167	0.643637
Higd1a	0.402894	0.0643802
Nap1l1	0.402778	0.205352
Gm2a	0.402679	0.371623
Cep85l	0.401987	0.488072
Sec13	0.401735	0.00632147
Ppp6c	0.401566	0.0234671
Ngdn	0.401191	0.0398429
Pwwp2a	0.401152	0.284487
Zc3h14	0.401078	0.250504
Arhgap27	0.400622	0.0197879
Tmem9b	0.40056	0.0942873
Map3k20	0.400075	0.0233752
Bicd2	0.39973	0.0375129
Pip5k1c	0.39971	0.0184244
Rfx2	0.399478	0.0871946
Trim37	0.399416	0.191365
Rpn2	0.398883	0.390671
Tnfrsf4	0.398856	0.184624
Yaf2	0.398697	0.0258575
Trnt1	0.398431	0.234534
Ube2f	0.398328	0.00690121
Pola2	0.398056	0.0942873
Clint1	0.397753	0.851514
Hprt	0.397372	0.0235992
Rabif	0.396165	0.0942873
Dnajc2	0.396073	0.279315
Exosc2	0.396034	0.282455
Carm1	0.395899	0.0422945
Slc26a10	0.39561	0.184874
Ap1s2	0.395428	0.32594
Scg5	0.395285	0.02629
Agpat2	0.39493	0.0233752
Fam53b	0.394901	0.138926
Rab22a	0.394815	0.076984
Ndufs5	0.394755	0.0171438
Mrps18c	0.394224	0.0942873
Orc3	0.393839	0.0237257
Med14	0.393828	0.290942
Dnajc13	0.393651	0.582259
Ilf2	0.393545	0.0212388
Ufm1	0.392686	0.00690121
Gpatch8	0.392666	0.106421
Jade1	0.392546	0.0303957
Dstn	0.392501	0.560826
Lysmd3	0.392425	0.643637
Thoc2	0.392385	0.141604
Ap1ar	0.392252	0.094988
Zfp317	0.392172	0.0942873
Il1r2	0.392159	0.02629
Arhgef1	0.391582	0.178954
Mrgbp	0.391524	0.02629
Spag6l	0.390775	0.00012826
Nox1	0.390661	0.295667
Cisd2	0.390343	0.778395
Prelid1	0.389551	0.26965
Slc14a1	0.388992	0.00924726
Ube2e2	0.38882	0.576605
Plcg2	0.388732	0.02629
2010109A12Rik	0.388717	0.0871946
Npepps	0.387896	0.363775
Rpl9	0.387501	0.512616
Pkn2	0.386672	0.35005
Slc25a33	0.386556	0.101835
Rhot2	0.38645	0.0422945
Tmem41b	0.386258	0.488072
Ext1	0.386194	0.276768
Tomm6	0.385939	0.17806
Rapgef5	0.385416	0.112712
Adgre5	0.3853	0.371319
Chek1	0.384725	0.0942873
Ankib1	0.384526	0.149179
Tcea1	0.384488	0.592528
Psip1	0.383812	0.168219
Fbxo17	0.383714	0.0942873
Sesn3	0.383645	0.109378
Gtf2ird2	0.383603	0.101835
Gmpr2	0.383202	0.184874
Ttpal	0.383201	0.560826
Malt1	0.383121	0.371878
Kcnq3	0.38292	0.0942873
Sra1	0.382869	0.195819
Rbm48	0.382811	0.195819
Pa2g4	0.382811	0.0940834
Jtb	0.382737	0.0643802
Uckl1	0.382601	0.488072
Sh3d21	0.382555	0.195819
Rbm28	0.381856	0.136222
Nr3c1	0.381687	0.421596
Zfp992	0.381423	0.0197879
Snhg16	0.380869	0.0871946
Hypk	0.379866	0.02629
Zfr	0.379766	0.168046
Zranb1	0.379311	0.219126
Nfxl1	0.379179	0.00690121
Cops9	0.37847	0.705563
Dock4	0.377628	0.472669
Ndufs3	0.377479	0.295667
Mak16	0.377295	0.472669
Dcaf11	0.37723	0.560826
Kcnab2	0.376877	0.334114
Selenoo	0.376773	0.0942873
Stau1	0.376389	0.725161
Cat	0.376047	0.184874
Klf10	0.376021	0.557713
Nup160	0.37583	0.5116
Cdk8	0.37572	0.149895
Ccdc85b	0.375525	0.101835
Chd8	0.375309	0.474701
Arl1	0.375287	0.00161578
Atpaf1	0.375025	0.560826
Rnf8	0.374386	0.26307
Mttp	0.37382	0.207231
Asap1	0.373713	0.743193
Denr	0.373363	0.17806
Shc1	0.373272	0.0171438
Glce	0.373242	0.614155
Ddx19b	0.373146	0.184874
Acadm	0.373126	0.488072
Mgat1	0.373119	0.00161578
Cep76	0.372939	0.472669
Spg21	0.372905	0.101835
Ss18	0.372344	0.326946
Dhdds	0.372245	0.0439574
Sp1	0.371923	0.381074
Trio	0.37172	0.282831
Rad54b	0.370612	0.174389
Atic	0.369902	0.0184244
Ankrd50	0.369074	0.0942873
Hcn2	0.369072	0.0942873
Adora2a	0.36806	0.184874
Eno1	0.367973	0.0171438
Iffo2	0.367916	0.0553633
Sf3b6	0.367729	0.381074
Ubox5	0.367039	0.0942873
Cdk6	0.367027	0.789147
Cox5b	0.366556	0.0579512
Golga7	0.366176	0.00012826
Map1s	0.365911	0.02629
Nolc1	0.365409	0.24223
Heca	0.365339	0.412992
Zhx2	0.365058	0.219966
Lap3	0.365019	0.184874
Chordc1	0.364961	0.23038
Kcnk1	0.364937	0.101835
Timm9	0.364063	0.0643802
Ano6	0.363763	0.891174
Zfp287	0.363583	0.195819
Hdac5	0.363144	0.195819
Slc10a3	0.363122	0.02629
Phf14	0.363091	0.265307
Ube2q2	0.362544	0.238423
Gtf2f2	0.362454	0.257142
Fyco1	0.362448	0.0892657
Fnbp1	0.362337	0.115703
Ncstn	0.36222	0.0375129
R3hdm2	0.362061	0.559809
Coro1b	0.361873	0.02629
Slc25a39	0.361558	0.101835
Dnttip2	0.361482	0.0104433
Uty	0.361405	0.604444
Fam133b	0.360875	0.475297
Arhgap45	0.360767	0.406951
Tmem241	0.360635	0.287688
Blm	0.36041	0.472669
Casp8	0.360393	0.0479487
Cln3	0.360344	0.0197879
Naa40	0.360311	0.59259
Sos2	0.360226	0.612141
Bub1b	0.360173	0.0942873
Trmt13	0.359891	0.503741
Npas4	0.359394	0.184874
Zfp719	0.359185	0.02629
Cse1l	0.35909	0.279315
Tulp2	0.358444	0.184874
Tet1	0.358375	0.184874
Zmynd8	0.358295	0.929962
Gnb4	0.358279	0.112712
Gm12185	0.358096	0.247808
Trappc8	0.357844	0.825931
Ddx3y	0.357575	0.31554
Evi5l	0.357322	0.0942873
Top2a	0.357164	0.795405
Rprd2	0.357035	0.124193
Cd79b	0.355901	0.02629
Nop14	0.355173	0.371623
Auts2	0.355068	0.0871946
Wdr3	0.354861	0.0375129
Coasy	0.354763	0.02629
Tpt1	0.354754	0.508854
Dcaf8	0.354723	0.291137
Ddx19a	0.354314	0.184874
Rnaset2b	0.354008	0.234534
Fam20b	0.353995	0.195819
Pnpla8	0.353919	0.615799
Nrros	0.353549	0.198286
Rpl19	0.353501	0.308426
Atg4b	0.35323	0.65951
Pdzd4	0.352917	0.000564389
Zfp131	0.352771	0.37896
Mindy3	0.352761	0.0598493
Tmem156	0.352356	0.191365
Ppt2	0.352294	0.0942873
Esco1	0.352271	0.135131
Rps18	0.352218	0.651758
Pigg	0.352198	0.02629
Coq2	0.351856	0.295667
Eif4a3	0.351788	0.112712
Sbno2	0.351612	0.705563
Adam19	0.351465	0.293459
Cwc15	0.351288	0.0604413
Ncoa5	0.351238	0.279315
Abracl	0.351236	0.184624
Ctcf	0.351062	0.220241
Mri1	0.350739	0.0184244
Oma1	0.350575	0.59259
Tmem50a	0.350543	0.227201
Lmbrd1	0.350382	0.0975996
Rere	0.350309	0.221695
Ino80	0.350215	0.298957
Ncoa7	0.349972	0.226293
Anapc11	0.349733	0.0942873
Poglut1	0.349721	0.0233752
Rps6kc1	0.349635	0.282455
Herc1	0.349387	0.230264
Ddx47	0.349081	0.0398429
Wdr13	0.349046	0.101835
Arl2	0.349014	0.0942873
Eftud2	0.348928	0.191365
Sike1	0.348811	0.17806
Bub3	0.348767	0.721218
Sec22b	0.3485	0.195819
Cpsf1	0.348412	0.295667
Polr3c	0.348318	0.0375129
Gpx1	0.347864	0.198286
Dek	0.347816	0.970234
Slc43a3	0.347354	0.000564389
Snf8	0.347324	0.0197879
Notch1	0.347109	0.197912
Adrb2	0.346956	0.560826
Dcaf12	0.346311	0.394081
Taf3	0.346172	0.164005
Mnt	0.346064	0.184874
Trim35	0.34587	0.313815
Ncmap	0.345759	0.195819
Tyw5	0.345707	0.0942873
Xylt1	0.345666	0.980332
Il6st	0.345629	0.833137
Pgm2l1	0.345554	0.878492
Rnf123	0.345425	0.0184244
Rbm12b1	0.345192	0.02629
Unc13b	0.344253	0.000564389
Ift80	0.344208	0.933442
Pafah1b2	0.344197	0.390671
Oxsr1	0.344197	0.0184244
Zfp827	0.343642	0.273576
B630019A10Rik	0.34311	0.560826
Rap1gap2	0.342432	0.986023
Mrps25	0.342415	0.02629
Dyrk2	0.34179	0.73699
Ehbp1	0.341523	0.752874
Bach1	0.341331	0.250102
Med4	0.341317	0.0940834
Spata6	0.341203	0.543366
Tchp	0.340201	0.295667
Cbarp	0.340075	0.195819
Zbed4	0.339891	0.0643802
Hsd11b1	0.339644	0.135128
Rpl31	0.339058	0.362311
Il2ra	0.338917	0.381612
Smu1	0.338687	0.37947
Mis18bp1	0.338637	0.184874
Ralgps2	0.338547	0.185065
Gabpb2	0.338136	0.363342
Rpl24	0.337891	0.339679
Trip4	0.337574	0.793853
Sh2b1	0.336996	0.0375129
Cand1	0.33694	0.0533939
Pmepa1	0.336828	0.0828612
Adpgk	0.336501	0.691714
Lrrc8b	0.336407	0.627926
Wdr77	0.336326	0.02629
Crk	0.335835	0.151923
Tmem229b	0.335802	0.00012826
Ubp1	0.335718	0.424168
Ncapd2	0.335606	0.0942873
Cbx7	0.335176	0.193862
Snrpa	0.33515	0.0212388
Pxn	0.334925	0.138926
Lasp1	0.33472	0.220396
Fau	0.334693	0.55975
Atp5g2	0.334502	0.400414
Polr3e	0.334502	0.0643802
Ankle1	0.334219	0.0233752
Caprin1	0.334126	0.179097
Polq	0.334057	0.0233752
Ndufa5	0.33403	0.184874
Bin1	0.333966	0.184624
Myb	0.333803	0.198286
Bop1	0.3337	0.101835
Hnrnpa3	0.333518	0.141329
Katnbl1	0.33325	0.133409
Psma5	0.333225	0.00144563
Josd1	0.333136	0.675538
Ccnc	0.333112	0.235581
Triap1	0.332981	0.00161578
Man1a2	0.332599	0.117922
Incenp	0.332393	0.394081
mt-Nd1	0.33206	0.582645
Alkbh5	0.331777	0.094988
Exosc9	0.331635	0.0942873
Prrc2a	0.33162	0.0795099
Fam117b	0.331587	0.986642
Tsix	0.331441	0.307719
Vhl	0.331213	0.282455
Arid3a	0.330429	0.101835
Helz	0.330184	0.467726
Srd5a3	0.330077	0.101835
Ss18l1	0.330013	0.195819
Dhx29	0.32979	0.643637
Ythdf1	0.329585	0.0184244
Cant1	0.329575	0.0942873
Zyx	0.329343	0.184874
Nanp	0.329124	0.0942873
Rpl11	0.329028	0.12008
Spast	0.328592	0.925694
Btaf1	0.328452	0.0735236
Edc4	0.328409	0.195819
Mipep	0.327865	0.675538
Efhd2	0.327624	0.184874
Sdcbp	0.327473	0.586634
2610044O15Rik8	0.327456	0.195819
Pithd1	0.327393	0.101835
Pgls	0.32722	0.184874
Cutc	0.327113	0.02629
Fam111a	0.326839	0.0459509
Haus6	0.326791	0.73699
Rdh14	0.326474	0.195819
Fkrp	0.326071	0.101835
Exoc6b	0.325664	0.189888
Rdh11	0.325425	0.02629
Ints2	0.325311	0.24223
Chd1l	0.325149	0.0984916
Tedc1	0.325086	0.184874
Snap47	0.324695	0.00161578
Cysltr1	0.324656	0.254085
Ccdc90b	0.324648	0.02629
Ifitm2	0.324549	0.101835
Tomm20	0.324491	0.985596
Gnai2	0.323906	0.227064
Pdcd6ip	0.323666	0.623883
Trmt1l	0.323617	0.614155
Washc2	0.323149	0.475297
Snapin	0.323053	0.295667
Fam222b	0.322561	0.400414
Rpl38	0.322365	0.589251
Snx3	0.321911	0.125379
Insig2	0.321534	0.0942873
Ppm1k	0.321478	0.59259
Prpf8	0.320905	0.107802
Ruvbl1	0.320471	0.0678091
Fam185a	0.320464	0.334114
Mnat1	0.320435	0.238423
Zfp410	0.320366	0.0678091
Zfp90	0.320315	0.101835
Per1	0.32018	0.568408
Spen	0.31989	0.394528
Nrd1	0.319716	0.0759054
Fam20a	0.319674	0.0197879
Cdr2	0.31944	0.191365
Kif4	0.319411	0.26965
Hltf	0.319255	0.311707
Togaram2	0.319094	0.000564389
Slc25a12	0.318859	0.0556626
Parl	0.31876	0.150484
Txnrd1	0.318724	0.234534
Ndufv1	0.318456	0.184874
Lama3	0.318269	0.000564389
Polk	0.317997	0.150484
Nudt13	0.317956	0.309286
Pou5f1	0.317833	0.000564389
Tbcb	0.317639	0.02629
Lrrc58	0.31738	0.0892657
Cd72	0.317353	0.184874
Wdr91	0.317251	0.184874
Nudt3	0.317165	0.121047
Mapk3	0.316793	0.0942873
Set	0.31679	0.171122
Tubgcp3	0.316653	0.532669
Rnf13	0.316338	0.232302
Gpc2	0.316294	0.000564389
Gse1	0.316283	0.352499
Blmh	0.316252	0.130843
Cdca8	0.316179	0.282455
Sbno1	0.31616	0.197691
Fyb	0.316157	0.543442
Cd8b1	0.315897	0.488072
Thnsl2	0.315744	0.000564389
Rars	0.315683	0.0303957
Slc38a10	0.315643	0.554169
Hadha	0.315079	0.343228
Lrrc75b	0.31502	0.000564389
Wdr36	0.314659	0.37947
Sf1	0.31444	0.1384
Mfsd4b4	0.314255	0.000564389
Acvr1b	0.314151	0.101835
Inpp4b	0.314097	0.722368
Gtpbp2	0.313841	0.234534
Rad23a	0.313805	0.778395
Tmem87b	0.313758	0.257466
A930037H05Rik	0.313629	0.101835
Bhlhb9	0.313521	0.195819
Rasd1	0.313503	0.000564389
Rxylt1	0.313392	0.472669
Sppl2b	0.313243	0.000564389
Cep57	0.313233	0.0658518
Knl1	0.313124	0.409027
Cox18	0.312746	0.394081
Camkk1	0.312675	0.000564389
Bcorl1	0.312273	0.112712
Dbi	0.312186	0.0678091
Taf6	0.312084	0.02629
Zfand1	0.312012	0.195819
Traf6	0.311469	0.107802
Adck2	0.311349	0.309286
Epg5	0.310947	0.0751179
Wdr5	0.310698	0.195819
Nup50	0.3105	0.234534
Zfp608	0.310411	0.409027
St3gal5	0.309983	0.000564389
Rgp1	0.309818	0.000564389
Heatr6	0.309811	0.0678091
Zfp97	0.309794	0.000564389
Gstp1	0.30979	0.00012826
Bloc1s1	0.309614	0.0942873
Mlec	0.309512	0.156532
Zfand2a	0.309254	0.73699
Rpl35	0.309232	0.581829
3110040N11Rik	0.309058	0.195819
Zfp280c	0.308954	0.506638
Rpap3	0.308815	0.00752828
Scarb2	0.308782	0.387002
Ftl1	0.308762	0.220396
Ncln	0.308712	0.00161578
Pgrmc2	0.308677	0.195819
Wsb1	0.308622	0.655214
Gatc	0.308476	0.000564389
Egln1	0.308149	0.103063
Mlxip	0.307944	0.586634
Fam210a	0.307862	0.675538
Arhgap5	0.307597	0.207211
Bclaf1	0.307394	0.461309
Rnf122	0.306962	0.000564389
Plpbp	0.306814	0.488072
Tmpo	0.306771	0.670268
Spg11	0.306768	0.877109
Herc3	0.306725	0.554649
Pdxdc1	0.306504	0.371319
Tfcp2	0.306406	0.184874
Fam241a	0.306338	0.65951
Vps52	0.30586	0.282455
Unc93b1	0.305834	0.0942873
Rnf17	0.305799	0.02629
Atp6v0d1	0.305599	0.868141
Irf5	0.305529	0.000564389
Rps24	0.305513	0.343
Cmpk1	0.305391	0.861893
Guca1b	0.305113	0.0942873
Dcp2	0.304985	0.144616
Rnf41	0.304812	0.309286
Selenos	0.304658	0.098409
Bcl7b	0.304487	0.00161578
Mbtps2	0.30442	0.846729
Rab11fip2	0.304139	0.287688
Iqgap2	0.30412	0.137904
Thrap3	0.303733	0.606307
Pot1b	0.30337	0.809393
Cd55	0.303364	0.503741
Rps6	0.303209	0.479754
Ccdc174	0.302955	0.0184244
Pde7a	0.302709	0.320318
Pnkp	0.302585	0.000564389
Rexo4	0.302456	0.0398429
Krtcap2	0.30229	0.17806
Atg9a	0.30228	0.02629
Ufc1	0.301999	0.195819
Tpx2	0.301977	0.0197879
Nudt7	0.301865	0.195819
Brms1l	0.30185	0.0790066
[truncated: 3,923 more rows]
